# Supplementary material for: Machine-learning based prediction of small molecule–surface interaction potentials
Source: Royal Society of Chemistry journal article supplement (doi:10.1039/d2fd00155a), 2022-12-28
Supplement: d2fd00155a1.pdf [file d2fd00155a1.pdf]

## ESI for Machine-learning based prediction of small molecule – surface interaction potentials

Ian Rouse<sup>\*a</sup>

Vladimir Lobaskin <sup>a</sup>

<sup>a</sup> School of Physics, University College Dublin, Belfield, Dublin 4, Ireland

\* ian.rouse@ucd.ie

December 20, 2022

### 1 Additional information

In Table S1 we provide SMILES codes and ID tags for all the molecules used in the development of the PMF prediction model, with the additional chemicals generated by selection of highly-cited SMILES codes from ChemSpider and miscellaneous small fragments in S2 and S3. Structures for all chemicals and their ID tags are shown in Figure S1, with chemicals sharing a SMILES code grouped together into a single figure. These SMILES codes may be mapped to multiple 3D structures or parameterisations if the same SMILES code is used for multiple epimers, enantiomers, etc or if the same molecule is parameterised using both GAFF and CHARMM. We assign a unique ID to each structure based on their equivalent amino acid for side chain analogues, common name or ChemSpider ID and using the suffix "-AC" to denote GAFF parameterisations or "-JS" for CHARMM. In Table S4 we list details of the surfaces considered in this work, including additional ones parameterised for the generation of PMFs for structures not yet covered by metadynamics. Table S5 presents the  $R^2$ , Pearson correlation, and mean KL divergence for each of the fifteen trained models using the final version of the methodology to identify which models successfully predict PMFs outside of their training set. The computed binding energies for the class of novel chemicals on FCC metal surfaces are provided in Table S6. To illustrate the predictive power of the model for the biochemical set of interest for UnitedAtom, we provide example tables of the predicted adsorption energies of the training molecules to amorphous carbon in Table S7 and the Cu (111) surface in Table S8. Figure S2 presents a comparison between the predictions for the testing chemical BGALNA on nine metal surfaces, including three copper surfaces not included in the training set and compares these to the closely related molecule BGLCNA and gives examples of the input potentials for these surfaces. In Figures S3 - S6 we show predicted potentials of mean force for a selection of four surfaces, comparing the input PMFs to the predictions generated using parameters matching the particular set of metadynamics used for their input and the canonical form using a set of consistent parameters and surface location determined from the potential probes for all predictions. We show these predictions for the gold (100) and CdSe surfaces to demonstrate strongly and weakly binding planar surfaces and to a hydrated  $\text{TiO}_2$  surface and surface-modified CNT to demonstrate more complex planar and cylindrical surfaces respectively. In these figures, the adsorbates are labelled omitting the SCA suffix for consistency with the UnitedAtom<sup>11</sup> naming convention.

| ID              | Source(s)    | SMILES                     | Description                                     |
|-----------------|--------------|----------------------------|-------------------------------------------------|
| ALASCA          | All          | C                          | Alanine side chain (methane)                    |
| ARGSCA          | All          | CCCNC(N)=[NH2+]            | Arginine side chain (1-Propylguanidinium)       |
| ASNSCA          | All          | CC(N)=O                    | ASN side chain (acetamide)                      |
| ASPSCA          | All          | CC(=O)[O-]                 | ASP side chain (acetate)                        |
| CYSSCA          | All          | CS                         | CYS side chain (carbon sulfide)                 |
| GLNSCA          | All          | CCC(N)=O                   | GLN side chain (propionamide)                   |
| GLUSCA          | All          | CCC(=O)[O-]                | GLU side chain (propionate)                     |
| HIDSCA          | All          | Cc1cnc[nH]1                | HID side chain ( $\delta$ -4-Methylimidazole)   |
| HIESCA          | All          | Cc1c[nH]cn1                | HIE side chain ( $\epsilon$ -4-Methylimidazole) |
| ILESCA          | All          | CCCC                       | ILE side chain (butane)                         |
| LEUSCA          | All          | CC(C)C                     | LEU side chain (isobutane)                      |
| LYSSCA          | All          | CCCC[NH3+]                 | LYS side chain (butylammonium)                  |
| METSCA          | All          | CCSC                       | MET side chain (ethyl methyl sulfide)           |
| PHESCA          | All          | Cc1ccccc1                  | PHE side chain (toluene)                        |
| SERSCA          | All          | CO                         | SER side chain (methanol)                       |
| THRSCA          | All          | CCO                        | THR side chain (ethanol)                        |
| TRPSCA          | All          | Cc1c[nH]c2ccccc12          | TRP side chain (3-methylindole)                 |
| TYRSCA          | All          | Cc1ccc(O)cc1               | TYR side chain (p-cresol)                       |
| VALSCA          | All          | CCC                        | VAL side chain (propane)                        |
| HIPSCA,HSPSCA   | All but SU-1 | Cc1c[nH]c[nH+]1            | Protonated HIS side chain                       |
| PROSCA          | UCD          | C1CC1                      | Cyclopropane                                    |
| GANSCA, GLUPSCA | All but SU-1 | CCC(=O)O                   | Protonated GLU side chain                       |
| ASPPSCA         | UCD          | CC(=O)O                    | Protonated ASP side chain                       |
| CYM             | Both         | C[S-]                      | Charged cysteine side chain                     |
| GLY             | SU-2         | NCC(=O)O                   | Glycine                                         |
| PRO             | SU-2         | O=C(O)C1CCCN1              | Proline                                         |
| ETA, MAMM       | All but SU-1 | C[NH3+]                    | Ethanolamine                                    |
| DMEP,PHO        | All but SU-1 | COP(=O)([O-])OC            | Phosphate                                       |
| CHL, NC4        | All but SU-1 | C[N+](C)(C)C               | Tetramethylammonium                             |
| EST,MAS         | All but SU-1 | COC(C)=O                   | Ester linkage                                   |
| AFUC            | UCD          | CC1OC(O)C(O)C(O)C1O        | Alpha fucose                                    |
| BGLCNA          | UCD          | CC(=O)NC1C(O)OC(CO)C(O)C1O | 2-acetyl-2-deoxy-beta-d-glucosamine             |
| AMAN            | UCD          | OCC1OC(O)C(O)C(O)C1O       | Alpha-d-mannose                                 |
| DGL, BGLC       | All but SU-1 | OCC1OC(O)C(O)C(O)C1O       | Beta-d-glucose                                  |
| BGALNA          | UCD          | CC(=O)NC1C(O)OC(CO)C(O)C1O | 2-acetyl-2-deoxy-beta-d-galactoseamine          |
| CHOL            | UCD          | C[N+](C)(C)CCO             | Choline                                         |

**Table S1** A summary of the chemicals present in the dataset used to build the model for the prediction of PMFs, containing the ID(s) for that molecule used, which PMF computational methods have been used for molecule, the SMILES code, formal charge, and a comment describing the chemical in question and providing the equivalent chemical for the side-chain analogues. In the toolkit, the ID is modified by "-JS" or "-AC" to distinguish between structures provided by UCD or generated using Charmm GUI and generated by ACPype respectively.

| ID       | Smiles            | Description           |
|----------|-------------------|-----------------------|
| ETHANE   | CC                | Ethane                |
| PROPANE  | CCC               | Propane               |
| ETHENE   | C=C               | Ethene                |
| PROPENE  | C=CC              | Propene               |
| BUTENE1  | C=CCC             | But-1-ene             |
| BUTENE2  | CC=CC             | But-2-ene             |
| BUTENE13 | C=CC=C            | But-1,3-ene           |
| CS-3     | CC(CN)O           | 1-amino-2-propanol    |
| CS-173   | CC(=N)O           | Acetamide             |
| CS-210   | CC(=O)CN          | Aminoacetone          |
| CS-218   | [NH4+]            | Ammonium ion          |
| CS-234   | C(CN)C(=O)O       | Beta-alanine          |
| CS-270   | C(=O)(N)[O-]      | Carbamate             |
| CS-271   | C(=O)(N)O         | Carbamic acid         |
| CS-280   | C(C(=O)O)ON       | (Aminooxy)acetic acid |
| CS-387   | CC(C)[N+](=O)[O-] | 2-nitropropane        |
| CS-582   | CC(C(=O)O)N       | DL-alanine            |
| CS-693   | C(=O)N            | Formamide             |
| CS-730   | C(C(=O)O)N        | Glycine               |
| CS-949   | C(=O)(C(=O)O)N    | Oxamate               |
| CS-1057  | CNCC(=O)O         | Sarcosine             |
| CS-1113  | C[N+](C)(C)[O-]   | Trimethylamine oxide  |
| CS-1143  | C(=N)(N)O         | Urea                  |
| CS-1913  | C/C(=N/O)/O       | Acetohydroxamic acid  |
| CS-3320  | c1cc(oc1)CN       | Furfurylamine         |
| CS-3530  | C(=N)(NO)O        | Hydroxyurea           |
| CS-3970  | CON               | Methoxyamine          |
| CS-5008  | C(=N)(NN)O        | Semicarbazide         |
| CS-5439  | CCOC(=O)N         | Urethane              |
| CS-5735  | C[C@@H](C(=O)O)N  | L-alanine             |
| CS-5894  | CN(C)N=O          | Dimethylnitrosamine   |
| CS-5993  | CN(C)C=O          | N,N-dimethylformamide |
| CS-6110  | C=NO              | Formoxime             |
| CS-6135  | C[N+](=O)[O-]     | Nitromethane          |
| CS-6330  | CCC(=O)N          | Propionamide          |
| CS-6331  | C=CC(=O)N         | Acrylamide            |
| CS-6332  | C(C(=O)N)Cl       | 2-chloroacetamide     |
| CS-6334  | CC(=O)NC          | N-methylacetamide     |
| CS-6338  | CC[N+](=O)[O-]    | Nitroethane           |
| CS-7021  | CNC(=O)NC         | N,N'-dimethylurea     |
| CS-7610  | C(C#N)C(=O)N      | 2-cyanoacetamide      |
| CS-7683  | c1cc(cnc1)O       | 3-Pyridinol           |
| CS-7720  | C(CO)C#N          | Hydracrylonitrile     |
| CS-8142  | C1CNC(=O)N1       | 2-imidazolidinone     |
| CS-8537  | c1ccnc(c1)O       | 2-pyridone            |
| CS-8733  | C(CN)CO           | 3-amino-1-propanol    |
| CS-8897  | c1cnoc1           | Isoxazole             |
| CS-8898  | c1cocn1           | Oxazole               |
| CS-8953  | Cc1cc(on1)C       | 3,5-Dimethylisoxazole |
| CS-9357  | C(C#N)C(=O)O      | Cyanoacetic acid      |
| CS-10471 | C1=CC(=O)N=C1O    | Maleimide             |
| CS-10955 | O=C1CCC(=O)N1     | Succinimide           |
| CS-11227 | CNC(=N)O          | 1-Methylurea          |
| CS-11244 | CN(C)C(=O)N       | 1,1-dimethylurea      |
| CS-11530 | C1CC(=NC1)O       | 2-Pyrrolidone         |

**Table S2** Additional chemicals generated via their SMILES code using ACPYPE and parameterised for use in the PMF Prediction toolkit, part 1

| ID          | Smiles                       | Description                              |
|-------------|------------------------------|------------------------------------------|
| CS-11727    | CN=C=O                       | Methyl isocyanate                        |
| CS-11787    | c1cccc1O                     | 4-pyridone                               |
| CS-4945     | CC(CO)N                      | DL-Alaninol                              |
| CS-12139    | C(=N)(N)NN=O                 | 1-Nitrosoguanidine                       |
| CS-12144    | C1CCN=C(C1)O                 | 2-Piperidone                             |
| CS-12229    | c1cc[n+](cc1)[O-]            | pyridine oxide                           |
| CS-12814    | CN1CCCC1=O                   | 1-methyl-2-pyrrolidinone                 |
| CS-13254    | c1cc([nH]c1)C=O              | 2-Formyl-1H-pyrrole                      |
| CS-13420    | C/C(=N/N)/O                  | Acetylhydrazide                          |
| CS-16629    | CN(C)C(=O)C=C                | N,N-dimethylacrylamide                   |
| CS-19489    | c1cnc1O                      | 1H-Pyrimidin-4-one                       |
| CS-20788    | CCC(CO)N                     | (+/-)-2-amino-1-butanol                  |
| CS-23329    | c1cnc([nH]1)C=O              | Imidazole-2-carbaldehyde                 |
| CS-28994    | CNC=O                        | N-methylformamide                        |
| CS-29107    | CC(=O)N(C)C                  | N,N-dimethylacetamide                    |
| CS-61461    | c1cc(=O)[nH]nc1              | Pyridazinone                             |
| CS-61465    | C1COC=N1                     | Oxazoline                                |
| CS-61686    | c1cnc(nc1)O                  | Pyrimidone                               |
| CS-61707    | CC(C)C(=O)N                  | Isobutyramide                            |
| CS-62242    | C(C(=N)O)N                   | Glycinamide                              |
| CS-64234    | C[C@H](C(=O)O)N              | D-(-)-Alanine                            |
| CS-65596    | c1cnc(c1)O                   | Pyrazinol                                |
| CS-66578    | C(=O)(NN)NN                  | Carbohydrazide                           |
| CS-66579    | C1COC(=N1)O                  | Oxazolidinone                            |
| CS-68900    | c1c(nc[nH]1)C=O              | 4-Imidazolecarboxaldehyde                |
| CS-72545    | C[C@@H](CO)N                 | (S)-(+)-2-amino-1-propanol               |
| CS-13835336 | C(CO)N                       | 2-aminoethanol                           |
| CS-13854944 | CN(C)CCO                     | Dimethylethanolamine                     |
| CS-13837537 | C1COCCN1                     | Morpholine                               |
| CS-13836021 | CNCCO                        | N-methylethanolamine                     |
| CS-13835861 | CC(C)(CO)N                   | 2-amino-2-methyl-1-propanol              |
| CS-10309795 | c1cn[nH]c1C=O                | 1H-pyrazole-3-carbaldehyde               |
| CS-8373112  | C1=CON=N1                    | Oxadiazole                               |
| CS-8009726  | [O-]\[N+](=N/C)CO            | Hydroxymethyl-methylimino-oxido-ammonium |
| CS-4481813  | C/C=N/O                      | Acetaldoxime                             |
| CS-311940   | c1cn[nH]c1O                  | Pyrazol-5-ol                             |
| CS-283071   | Cc1cc([nH]1)O                | 3-Methyl-5-pyrazolone                    |
| CS-161778   | c1coc(=O)[nH]1               | Oxazolone                                |
| CS-110510   | C=C(C(=O)O)N                 | Dehydroalanine                           |
| CS-86862    | c1c([nH]nc1O)N               | 3-Amino-5-pyrazolone                     |
| CS-66243    | C(C(CO)O)N                   | 1-aminoglycerol                          |
| CS-65711    | CS(=O)(=O)N                  | Methanesulfonamide                       |
| CS-59559    | Cc1cc(no1)N                  | 3-amino-5-methyl-isoxazole               |
| CS-55104    | C(C(CN)O)N                   | 1,3-diamino-2-propanol                   |
| CS-13867413 | COC(=O)CC#N                  | Methyl cyanoacetate                      |
| CS-61591    | C(C(CO)N)O                   | Serinol                                  |
| CS-30663    | C/N=[N+](\C)/[O-]            | Azoxymethane                             |
| CAFF        | Cn1cnc2n(C)c(=O)n(C)c(=O)c12 | Caffeine                                 |
| Water       | O                            | Water, TIP3, H charge only               |
| WaterUCD    | O                            | Water, TIP3, H charge and LJ             |
| METHANAL    | C=O                          | Formaldehyde                             |
| THEOBROMINE | Cn1cnc2c1c(=O)[nH]c(=O)n2C   | Theobromine                              |
| BENZENE     | c1ccccc1                     | Benzene                                  |
| FURAN       | c1ccoc1                      | Furan                                    |
| PYRROLE     | [nH]1cccc1                   | Pyrrole                                  |

**Table S3** Additional chemicals generated via their SMILES code using ACPYPE and parameterised for use in the PMF Prediction toolkit, part 2

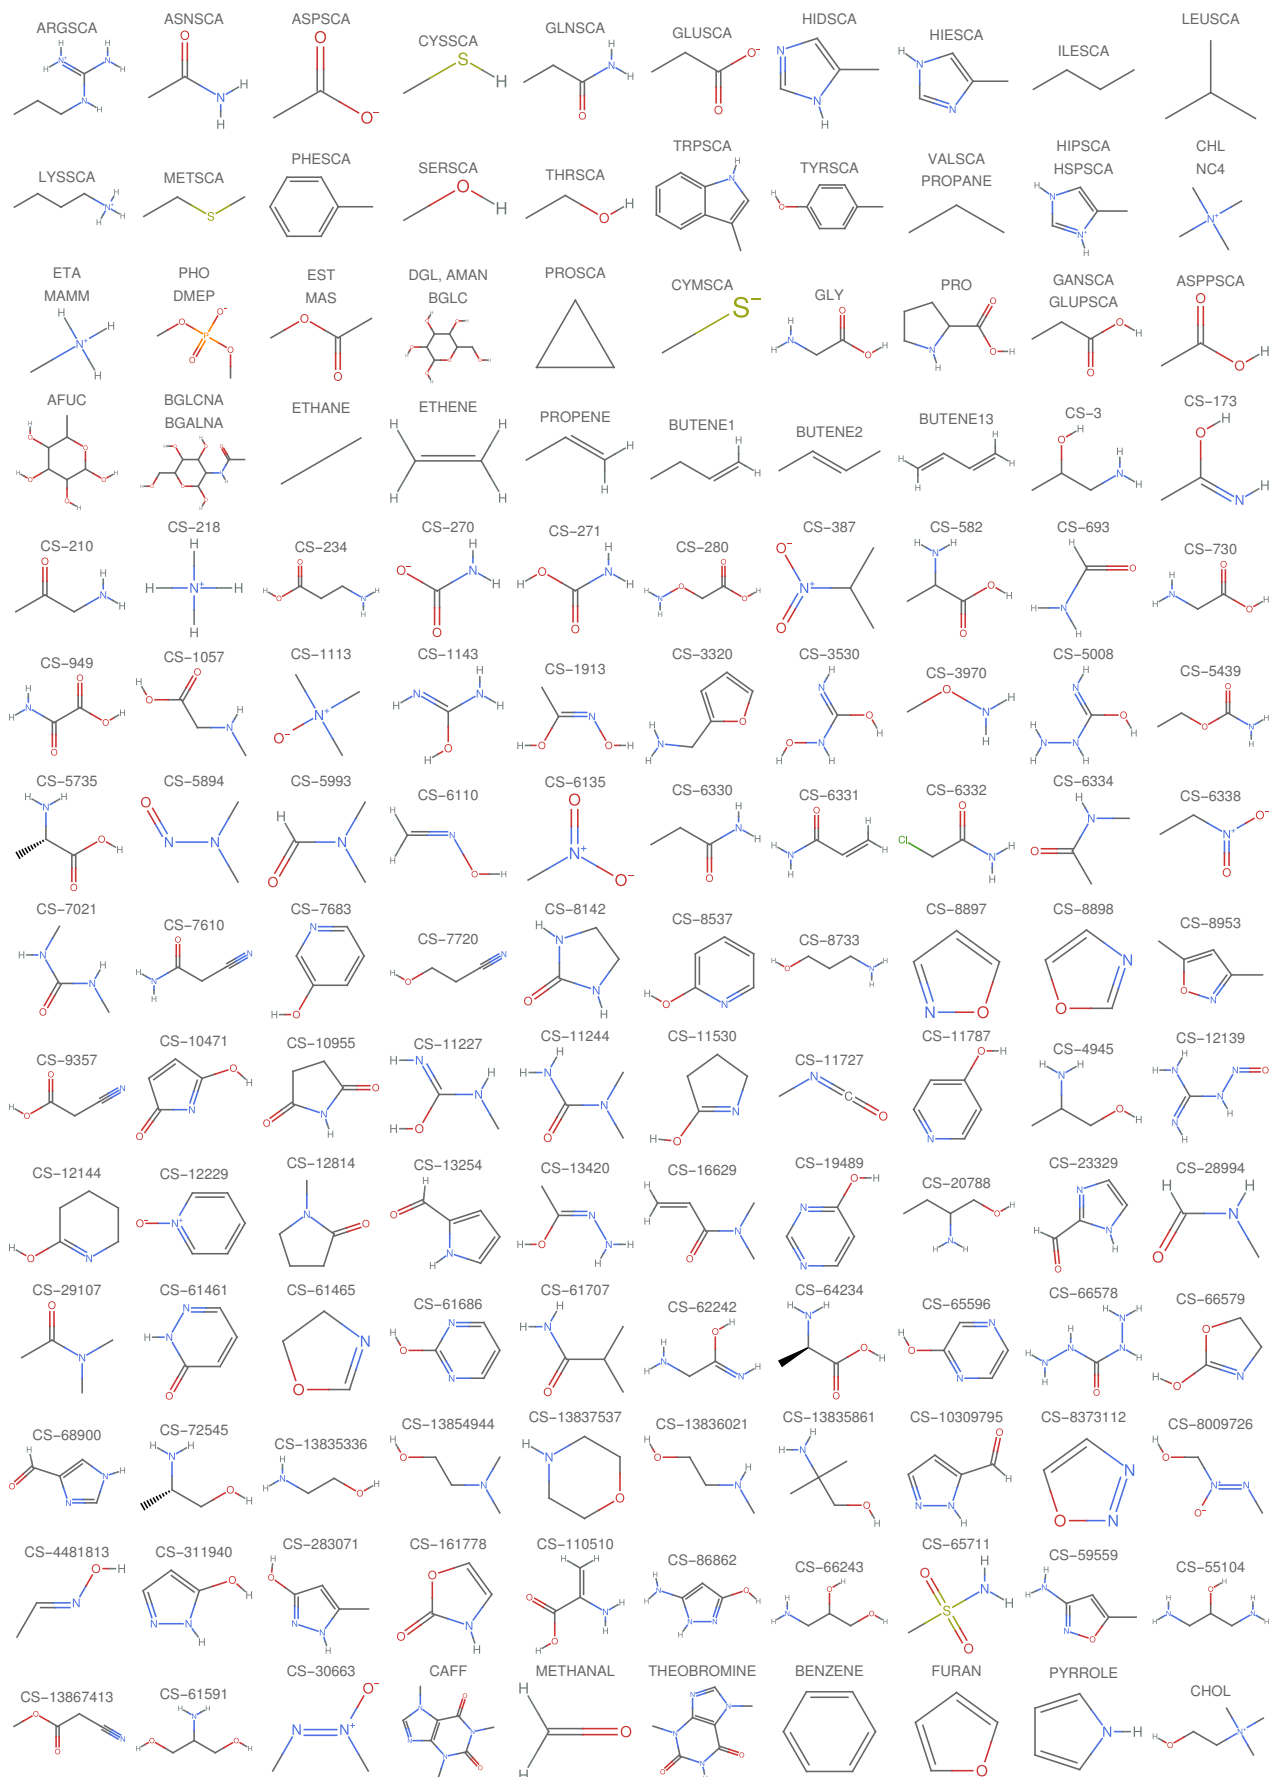

**Figure S1** ID tags and structures for the full set of chemicals parameterised for the prediction of PMFs. Molecules sharing a SMILES code are grouped but may possess different structures or force field parameterisations.

| Surface ID            | Shape       | Source | SSD Type ( $s$ ) | Resolution [nm] | Notes                                                                        |
|-----------------------|-------------|--------|------------------|-----------------|------------------------------------------------------------------------------|
| AuFCC100              | Planar      | 0      | 0                | 0.0032          | FCC Gold (100)                                                               |
| CdSeWurtzite2-10      | Planar      | 0      | 0                | 0.0045          | CdSe Wurtzite (2-10)                                                         |
| TiO2-ana-100          | Planar      | 1      | 1                | 0.002           | Hydrated anatase (100)                                                       |
| TiO2-ana-101          | Planar      | 1      | 1                | 0.002           | Hydrated anatase (101)                                                       |
| TiO2-rut-110          | Planar      | 1      | 1                | 0.002           | Hydrated rutile (110)                                                        |
| TiO2-rut-100          | Planar      | 1      | 1                | 0.002           | Hydrated rutile (110)                                                        |
| Fe2O3-001O            | Planar      | 1      | 1                | 0.002           | Hydrated iron oxide (001)                                                    |
| SiO2-Quartz           | Planar      | 1      | 1                | 0.002           | Quartz                                                                       |
| SiO2-Amorphous        | Planar      | 1      | 1                | 0.002           | Amorphous silica                                                             |
| CNT15                 | Cylindrical | 1      | 0                | 0.002           | Carbon nanotube, 1.5 nm diameter                                             |
| CNT15-COOH-30         | Cylindrical | 1      | 0                | 0.002           | Carbon nanotube, 1.5 nm diameter, 30%wt COOH modified                        |
| CNT15-COOH-3          | Cylindrical | 1      | 0                | 0.002           | Carbon nanotube, 1.5 nm diameter, 3%wt COOH modified                         |
| CNT15-COO-10          | Cylindrical | 1      | 0                | 0.002           | Carbon nanotube, 1.5 nm diameter, 10%wt COO <sup>-</sup> modified            |
| CNT15-COO-3           | Cylindrical | 1      | 0                | 0.002           | Carbon nanotube, 1.5 nm diameter, 3%wt COO <sup>-</sup> modified             |
| CNT15-NH2-14          | Cylindrical | 1      | 0                | 0.002           | Carbon nanotube, 1.5 nm diameter, 14%wt NH <sub>2</sub> modified             |
| CNT15-NH2-2           | Cylindrical | 1      | 0                | 0.002           | Carbon nanotube, 1.5 nm diameter, 2%wt NH <sub>2</sub> modified              |
| CNT15-NH3+-4          | Cylindrical | 1      | 0                | 0.002           | Carbon nanotube, 1.5 nm diameter, 4%wt NH <sub>3</sub> <sup>+</sup> modified |
| CNT15-NH3+-2          | Cylindrical | 1      | 0                | 0.002           | Carbon nanotube, 1.5 nm diameter, 2%wt NH <sub>3</sub> <sup>+</sup> modified |
| CNT15-OH-14           | Cylindrical | 1      | 0                | 0.002           | Carbon nanotube, 1.5 nm diameter, 14%wt OH modified                          |
| CNT15-OH-4            | Cylindrical | 1      | 0                | 0.002           | Carbon nanotube, 1.5 nm diameter, 4%wt OH modified                           |
| graphene              | Planar      | 1      | 3                | 0.002           | Single-layer graphene                                                        |
| bi-graphene           | Planar      | 1      | 3                | 0.002           | Double-layer graphene                                                        |
| tri-graphene          | Planar      | 1      | 3                | 0.002           | Triple-layer graphene                                                        |
| grapheneoxide         | Planar      | 1      | 3                | 0.002           | Graphene oxide, 30% oxidation                                                |
| redgrapheneoxide      | Planar      | 1      | 3                | 0.002           | Reduced graphene oxide, 10% oxidation                                        |
| C-amorph-2            | Planar      | 1      | 1                | 0.002           | Amorphous carbon                                                             |
| AuFCC100UCD           | Planar      | 3      | 2                | 0.00051         | FCC Gold (100)                                                               |
| AuFCC110UCD           | Planar      | 2      | 2                | 0.00034         | FCC Gold (110)                                                               |
| AuFCC111UCD           | Planar      | 2      | 2                | 0.00029         | FCC Gold (111)                                                               |
| Ag100                 | Planar      | 3      | 2                | 0.0018          | FCC Silver (100)                                                             |
| Ag110                 | Planar      | 2      | 2                | 0.0018          | FCC Silver (101)                                                             |
| Ag111                 | Planar      | 2      | 2                | 0.0018          | FCC Silver (111)                                                             |
| Fe001                 | Planar      | 3      | 2                | 0.0018          | FCC Iron (001/100)                                                           |
| Fe110                 | Planar      | 2      | 2                | 0.0019          | FCC Iron (110)                                                               |
| Fe111                 | Planar      | 2      | 2                | 0.0019          | FCC Iron (111)                                                               |
| Cu001                 | Planar      | 3      | 2                | 0.00030         | FCC Copper (001/100)                                                         |
| Cu110                 | Planar      | 2      | 2                | 0.00021         | FCC Copper (110)                                                             |
| Cu111                 | Planar      | 2      | 2                | 0.00025         | FCC Copper (111)                                                             |
| C-amorph-3            | Planar      | 1      | 1                | 0.002           | Amorphous carbon                                                             |
| AuFCC100-Ablate0      | Planar      | 1      | 0                | 0.002           | FCC Gold (100), 0% ablation                                                  |
| AuFCC100-Ablate5      | Planar      | 1      | 0                | 0.002           | FCC Gold (100), 5% ablation                                                  |
| AuFCC100-Ablate25     | Planar      | 1      | 0                | 0.002           | FCC Gold (100), 25% ablation                                                 |
| AuFCC100-Ablate50     | Planar      | 1      | 0                | 0.002           | FCC Gold (100), 50% ablation                                                 |
| AuFCC100-Ablate75     | Planar      | 1      | 0                | 0.002           | FCC Gold (100), 75% ablation                                                 |
| AuFCC100-Ablate100    | Planar      | 1      | 0                | 0.002           | FCC Gold (100), 100% ablation                                                |
| GoldBrush             | Planar      | 1      | 0                | 0.002           | FCC Gold (100), PE brush, 50% coverage                                       |
| CaO001                | Planar      | 1      | 0                | 0.002           | FCC Calcium oxide (001)                                                      |
| Pt001                 | Planar      | 1      | 0                | 0.002           | FCC Platinum(001/100)                                                        |
| TricalciumSilicate001 | Planar      | 1      | 0                | 0.002           | Tricalcium silicate (001)                                                    |
| Au-001-PE             | Planar      | 1      | 0                | 0.002           | Au (100), PE brush, 100% coverage                                            |
| Au-001-PEG            | Planar      | 1      | 0                | 0.002           | Au (100), PEG brush, 100% coverage                                           |
| Al2O3-001             | Planar      | 1      | 0                | 0.002           | Aluminium oxide (001)                                                        |
| Cr2O3-001             | Planar      | 1      | 0                | 0.002           | Chromium oxide (001)                                                         |
| Ce-001                | Planar      | 1      | 0                | 0.002           | FCC Cerium (001)                                                             |
| Hydroxyapatite-001    | Planar      | 1      | 0                | 0.002           | Hydroxyapatite (001)                                                         |

**Table S4** A summary of the surfaces considered in this work, listing the internal ID, shape, source (0: SU (no ions), 1: SU (ions), 2: UCD-1 (110 and 111 surfaces), 3: UCD-2 (100 surfaces) ) and the zero-indexed categorical variable defining the convention for the SSD (0: nominal surface - COM distance, 1: minimum surface atom - COM distance, 2: slab-width-adjusted COM - COM distance, 3: surface atom COM - COM distance), with e.g.  $s = 0$  corresponding to SSD class 1 in the main text. The first set indicates development surfaces, the second testing surfaces, and the final are additional surfaces without known PMFs.

| Model ID    | Class | $E_{ads}$ | Correlation | $E_{ads}$ $R^2$ | $\langle KL \rangle$ |
|-------------|-------|-----------|-------------|-----------------|----------------------|
| Cluster-A-1 | TMTC  |           | 1.0         | 0.98            | 0.17                 |
| Cluster-A-1 | TMVC  |           | 0.9         | 0.78            | 0.37                 |
| Cluster-A-1 | VMTC  |           | 0.94        | 0.86            | 0.57                 |
| Cluster-A-1 | VMVC  |           | 0.83        | 0.62            | 0.69                 |
| Cluster-A-2 | TMTC  |           | 1.0         | 0.99            | 0.16                 |
| Cluster-A-2 | TMVC  |           | 0.89        | 0.79            | 0.33                 |
| Cluster-A-2 | VMTC  |           | 0.79        | 0.44            | 0.71                 |
| Cluster-A-2 | VMVC  |           | 0.83        | 0.67            | 0.58                 |
| Cluster-A-3 | TMTC  |           | 1.0         | 0.99            | 0.16                 |
| Cluster-A-3 | TMVC  |           | 0.73        | 0.5             | 0.36                 |
| Cluster-A-3 | VMTC  |           | 0.7         | 0.36            | 0.37                 |
| Cluster-A-3 | VMVC  |           | 0.67        | 0.01            | 0.33                 |
| Cluster-A-4 | TMTC  |           | 1.0         | 0.98            | 0.16                 |
| Cluster-A-4 | TMVC  |           | 0.82        | 0.66            | 0.37                 |
| Cluster-A-4 | VMTC  |           | 0.88        | 0.53            | 0.55                 |
| Cluster-A-4 | VMVC  |           | 0.65        | 0.34            | 0.87                 |
| Cluster-A-5 | TMTC  |           | 1.0         | 0.98            | 0.15                 |
| Cluster-A-5 | TMVC  |           | 0.9         | 0.72            | 0.43                 |
| Cluster-A-5 | VMTC  |           | 0.93        | 0.83            | 0.38                 |
| Cluster-A-5 | VMVC  |           | 0.88        | 0.76            | 0.36                 |
| Simple-B-1  | T     |           | 1.0         | 0.99            | 0.14                 |
| Simple-B-1  | V     |           | 0.91        | 0.82            | 0.39                 |
| Simple-B-2  | T     |           | 1.0         | 0.99            | 0.15                 |
| Simple-B-2  | V     |           | 0.91        | 0.83            | 0.32                 |
| Simple-B-3  | T     |           | 1.0         | 0.99            | 0.14                 |
| Simple-B-3  | V     |           | 0.9         | 0.82            | 0.41                 |
| Simple-B-4  | T     |           | 1.0         | 0.98            | 0.14                 |
| Simple-B-4  | V     |           | 0.89        | 0.78            | 0.4                  |
| Simple-B-5  | T     |           | 1.0         | 0.99            | 0.15                 |
| Simple-B-5  | V     |           | 0.91        | 0.83            | 0.39                 |
| Simple-B-6  | T     |           | 1.0         | 0.99            | 0.13                 |
| Simple-B-6  | V     |           | 0.94        | 0.87            | 0.33                 |
| Simple-B-7  | T     |           | 1.0         | 0.99            | 0.14                 |
| Simple-B-7  | V     |           | 0.93        | 0.85            | 0.33                 |
| Simple-B-8  | T     |           | 1.0         | 0.99            | 0.14                 |
| Simple-B-8  | V     |           | 0.87        | 0.74            | 0.35                 |
| Simple-B-9  | T     |           | 1.0         | 0.99            | 0.14                 |
| Simple-B-9  | V     |           | 0.92        | 0.84            | 0.31                 |
| Simple-B-10 | T     |           | 1.0         | 0.99            | 0.2                  |
| Simple-B-10 | V     |           | 0.93        | 0.86            | 0.43                 |

**Table S5** Summary statistics for the accuracy of binding energies (correlation and  $R^2$ ) and mean Kullback-Leibler divergences for PMFs extracted from the predicted potentials of mean force compared to the input potentials for the training and validation groups for the model versions summarised by a split type (clustering then random or simple random), the use of all data (A) or bootstrap data (B) and an ID number. For simple random splitting, the class column indicates results for PMFs included in the training set for that particular bootstrap dataset and training-validation split, with the validation set containing all out-of-bag PMFs. For cluster splitting, TMTC indicates the training material, training chemical set and so on, with all PMFs featured in one of these four classes.

| Material    | Chemical  | E(MD) [kJ·mol <sup>-1</sup> ] | E(Simple) [kJ·mol <sup>-1</sup> ] | E(Cluster) [kJ·mol <sup>-1</sup> ] |
|-------------|-----------|-------------------------------|-----------------------------------|------------------------------------|
| Ag100       | BGALNA-JS | -49.                          | -13.7 ± 2.7                       | -13.5 ± 2.1                        |
| Ag100       | CHOL-JS   | -10.6                         | -7.9 ± 2.9                        | -3.3 ± 0.8                         |
| Ag110       | BGALNA-JS | -64.4                         | -32. ± 4.                         | -31.2 ± 2.9                        |
| Ag110       | CHOL-JS   | -21.2                         | -29. ± 6.                         | -27. ± 5.                          |
| Ag111       | BGALNA-JS | -68.8                         | -46. ± 6.                         | -43. ± 5.                          |
| Ag111       | CHOL-JS   | -15.8                         | -34. ± 11.                        | -38. ± 14.                         |
| AuFCC100UCD | BGALNA-JS | -15.5                         | -14. ± 4.                         | -12.0 ± 2.0                        |
| AuFCC100UCD | CHOL-JS   | -7.8                          | -7. ± 4.                          | -5.3 ± 0.7                         |
| AuFCC110UCD | BGALNA-JS | -51.                          | -36. ± 4.                         | -33. ± 6.                          |
| AuFCC110UCD | CHOL-JS   | -20.2                         | -30. ± 6.                         | -32. ± 13.                         |
| AuFCC111UCD | BGALNA-JS | -45.1                         | -45. ± 9.                         | -45.6 ± 2.3                        |
| AuFCC111UCD | CHOL-JS   | -18.5                         | -32. ± 8.                         | -33. ± 12.                         |
| Cu001       | BGALNA-JS | -67.2                         | -36. ± 6.                         | -31. ± 4.                          |
| Cu110       | BGALNA-JS | -51.3                         | -33. ± 9.                         | -27.5 ± 3.2                        |
| Cu111       | BGALNA-JS | -65.3                         | -46. ± 8.                         | -47.6 ± 2.2                        |

**Table S6** Adsorption energies of two molecules not used in the training set to FCC gold, silver and copper for (100), (110) and (111) surfaces, comparing the values found from metadynamics simulations to those predicted by the two ensemble models. The provided errors are obtained from the standard deviation of the adsorption energies predicted by each individual ensemble member.

| Material   | Chemical  | E(MD) [kJ·mol <sup>-1</sup> ] | E(Simple) [kJ·mol <sup>-1</sup> ] | E(Cluster) [kJ·mol <sup>-1</sup> ] |
|------------|-----------|-------------------------------|-----------------------------------|------------------------------------|
| C-amorph-3 | ALASCA-AC | -2.2                          | -0.3 ± 0.5                        | 0.60 ± 0.19                        |
| C-amorph-3 | ARGSCA-AC | -16.5                         | -16.9 ± 1.1                       | -11.7 ± 2.3                        |
| C-amorph-3 | ASNSCA-AC | -8.5                          | -6.9 ± 1.5                        | -5.2 ± 2.0                         |
| C-amorph-3 | ASPSCA-AC | -4.1                          | -2.3 ± 1.2                        | -1.8 ± 1.0                         |
| C-amorph-3 | CHL-AC    | -3.1                          | -2.1 ± 0.9                        | -1.47 ± 0.33                       |
| C-amorph-3 | CYMSCA-AC | -2.2                          | -1.5 ± 1.2                        | -0.9 ± 0.8                         |
| C-amorph-3 | CYSSCA-AC | -5.1                          | -2.0 ± 0.8                        | -0.61 ± 0.33                       |
| C-amorph-3 | DGL-AC    | -19.                          | -17.1 ± 2.6                       | -14. ± 4.                          |
| C-amorph-3 | EST-AC    | -13.5                         | -12.4 ± 1.4                       | -9.2 ± 1.6                         |
| C-amorph-3 | ETA-AC    | -0.7                          | 0.0 ± 0.5                         | 0.35 ± 0.33                        |
| C-amorph-3 | GANSCA-AC | -12.8                         | -11.9 ± 1.6                       | -8.7 ± 1.6                         |
| C-amorph-3 | GLNSCA-AC | -11.3                         | -9.7 ± 1.7                        | -7.2 ± 1.3                         |
| C-amorph-3 | GLUSCA-AC | -6.5                          | -7.1 ± 3.0                        | -5.6 ± 2.1                         |
| C-amorph-3 | GLY-AC    | -9.8                          | -8.4 ± 1.9                        | -7.4 ± 2.5                         |
| C-amorph-3 | HIDSCA-AC | -14.8                         | -14.9 ± 1.2                       | -11.5 ± 2.5                        |
| C-amorph-3 | HIESCA-AC | -14.9                         | -15.9 ± 0.8                       | -12.9 ± 1.9                        |
| C-amorph-3 | HIPSCA-AC | -12.7                         | -15.3 ± 1.7                       | -11. ± 4.                          |
| C-amorph-3 | ILESCA-AC | -11.9                         | -8.0 ± 1.9                        | -5.9 ± 1.6                         |
| C-amorph-3 | LEUSCA-AC | -11.8                         | -7.3 ± 2.7                        | -5.6 ± 0.9                         |
| C-amorph-3 | LYSSCA-AC | -9.                           | -5.3 ± 1.7                        | -3.8 ± 1.4                         |
| C-amorph-3 | METSCA-AC | -12.4                         | -9.5 ± 2.1                        | -7.5 ± 2.4                         |
| C-amorph-3 | PHESCA-AC | -16.5                         | -15.7 ± 2.4                       | -10.7 ± 0.5                        |
| C-amorph-3 | PHO-AC    | -8.                           | -6.5 ± 2.7                        | -6.8 ± 2.3                         |
| C-amorph-3 | PRO-AC    | -18.4                         | -15.6 ± 2.4                       | -11.3 ± 2.7                        |
| C-amorph-3 | SERSCA-AC | -3.9                          | -1.2 ± 0.7                        | 0.0 ± 0.4                          |
| C-amorph-3 | THRSCA-AC | -6.9                          | -3.1 ± 0.9                        | -2.6 ± 1.0                         |
| C-amorph-3 | TRPSCA-AC | -21.1                         | -25.3 ± 1.9                       | -19.0 ± 2.5                        |
| C-amorph-3 | TYRSCA-AC | -20.2                         | -22.6 ± 2.8                       | -15.5 ± 3.0                        |
| C-amorph-3 | VALSCA-AC | -8.8                          | -5.1 ± 1.6                        | -3.0 ± 1.3                         |

**Table S7** Adsorption energies of molecules used for the development of the model to an amorphous carbon surface not included in the training set, comparing the values found from metadynamics simulations to those predicted by the two ensemble models. The provided errors are obtained from the standard deviation of the adsorption energies predicted by each individual ensemble member.



| Material | Chemical   | E(MD) [kJ·mol <sup>-1</sup> ] | E(Simple) [kJ·mol <sup>-1</sup> ] | E(Cluster) [kJ·mol <sup>-1</sup> ] |
|----------|------------|-------------------------------|-----------------------------------|------------------------------------|
| Cu111    | AFUC-JS    | -43.1                         | -37. ± 10.                        | -39. ± 5.                          |
| Cu111    | ALASCA-JS  | 1.7                           | -2.3 ± 2.6                        | 0.4 ± 0.6                          |
| Cu111    | AMAN-JS    | -55.7                         | -41. ± 10.                        | -55. ± 5.                          |
| Cu111    | ARGSCA-JS  | -72.                          | -52. ± 12.                        | -53. ± 18.                         |
| Cu111    | ASNCA-JS   | -20.1                         | -19.0 ± 2.0                       | -18.4 ± 1.2                        |
| Cu111    | ASPPSCA-JS | -23.6                         | -18.4 ± 1.7                       | -17.6 ± 1.4                        |
| Cu111    | ASPCSA-JS  | -12.2                         | -10.4 ± 1.7                       | -9.5 ± 0.4                         |
| Cu111    | BGALNA-JS  | -65.3                         | -46. ± 8.                         | -47.6 ± 2.2                        |
| Cu111    | BGLC-JS    | -55.9                         | -48. ± 9.                         | -56.3 ± 3.4                        |
| Cu111    | BGLCNA-JS  | -76.                          | -45. ± 6.                         | -44. ± 5.                          |
| Cu111    | CYMCA-JS   | -22.3                         | -18.0 ± 1.6                       | -17.2 ± 0.9                        |
| Cu111    | CYSSCA-JS  | -14.8                         | -13.8 ± 1.3                       | -12.0 ± 0.9                        |
| Cu111    | DMEP-JS    | -57.5                         | -39. ± 6.                         | -45.4 ± 2.9                        |
| Cu111    | GLNSCA-JS  | -25.7                         | -21.5 ± 1.9                       | -21.6 ± 1.1                        |
| Cu111    | GLUPSCA-JS | -29.9                         | -20.8 ± 2.2                       | -20.2 ± 2.8                        |
| Cu111    | GLUSCA-JS  | -14.8                         | -14. ± 4.                         | -11.1 ± 3.0                        |
| Cu111    | HIDCA-JS   | -31.8                         | -27. ± 4.                         | -26.2 ± 1.3                        |
| Cu111    | HIESCA-JS  | -33.6                         | -26.3 ± 2.8                       | -24.3 ± 1.5                        |
| Cu111    | HIPCA-JS   | -42.                          | -30. ± 4.                         | -29. ± 5.                          |
| Cu111    | ILESCA-JS  | -10.1                         | -12.0 ± 2.5                       | -12.4 ± 3.4                        |
| Cu111    | LEUSCA-JS  | -4.                           | -9.8 ± 3.1                        | -8.1 ± 1.4                         |
| Cu111    | LYSSCA-JS  | -12.3                         | -18. ± 7.                         | -15.1 ± 3.1                        |
| Cu111    | MAMM-JS    | -3.8                          | -2.8 ± 1.3                        | -2.2 ± 2.1                         |
| Cu111    | MAS-JS     | -23.6                         | -20.3 ± 2.5                       | -18.9 ± 2.8                        |
| Cu111    | METSCA-JS  | -27.8                         | -23.9 ± 2.3                       | -23.0 ± 0.9                        |
| Cu111    | NC4-JS     | -14.3                         | -15.0 ± 2.0                       | -13.0 ± 1.4                        |
| Cu111    | PHESCA-JS  | -32.7                         | -28. ± 4.                         | -27.8 ± 1.0                        |
| Cu111    | PROSCA-JS  | -4.                           | -8.6 ± 1.5                        | -6.8 ± 1.0                         |
| Cu111    | SERSCA-JS  | -3.                           | -5.0 ± 3.1                        | -3.4 ± 2.4                         |
| Cu111    | THRSCA-JS  | -5.9                          | -9. ± 4.                          | -8.6 ± 1.7                         |
| Cu111    | TRPSCA-JS  | -75.                          | -54. ± 11.                        | -60.6 ± 3.1                        |
| Cu111    | TYRSCA-JS  | -51.1                         | -35. ± 8.                         | -38. ± 9.                          |
| Cu111    | VALSCA-JS  | -1.6                          | -8.3 ± 2.7                        | -6.2 ± 0.8                         |

**Table S8** Adsorption energies of molecules used for the development of the model to a copper (111) surface not included in the training set, comparing the values found from metadynamics simulations to those predicted by the two ensemble models. The provided errors are obtained from the standard deviation of the adsorption energies predicted by each individual ensemble member.

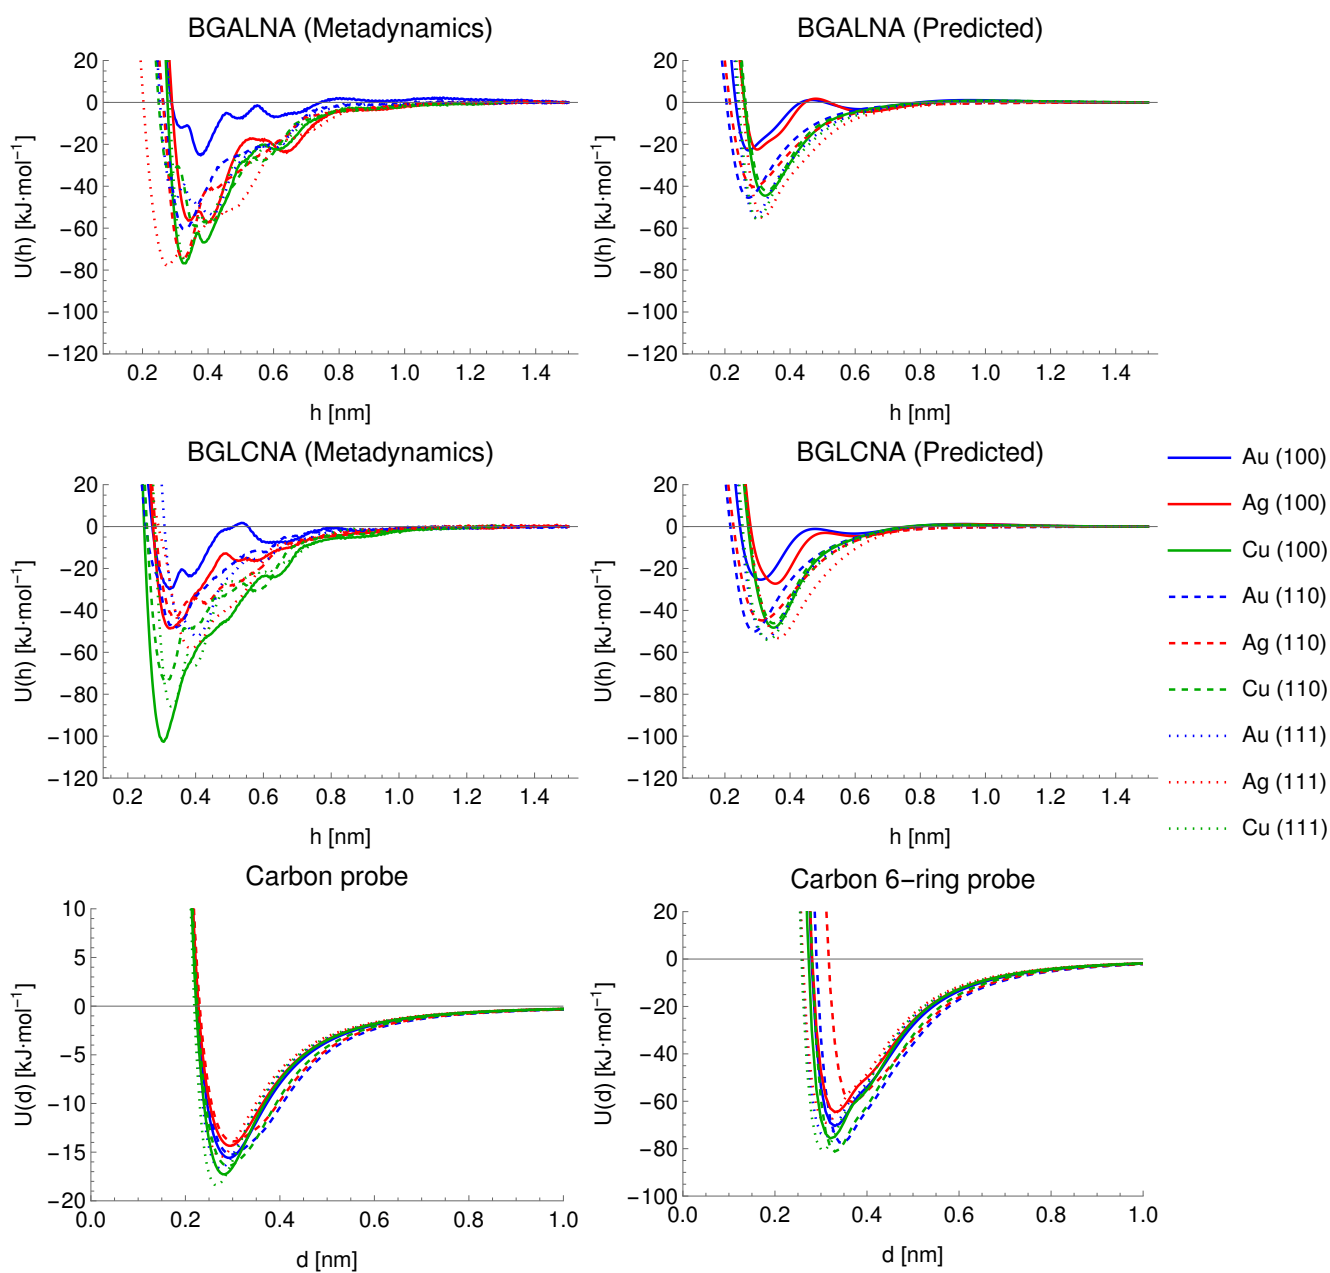

**Figure S2** Top: Potentials of mean force for the testing sugar molecule BGALNA on nine FCC metal surfaces obtained via metadynamics simulations (left) and using the approach detailed in this work (right). Prediction parameters are matched to those used for the metadynamics simulations. Middle: As top, but for the sugar molecule BGLCNA used in the training set. Bottom: Input potentials for these FCC metal surfaces showing the single atom carbon probe (left) and the six-membered ring probe (right). In all cases, the gold (blue) and silver (red) surfaces are used in training while copper (green) was reserved for testing.

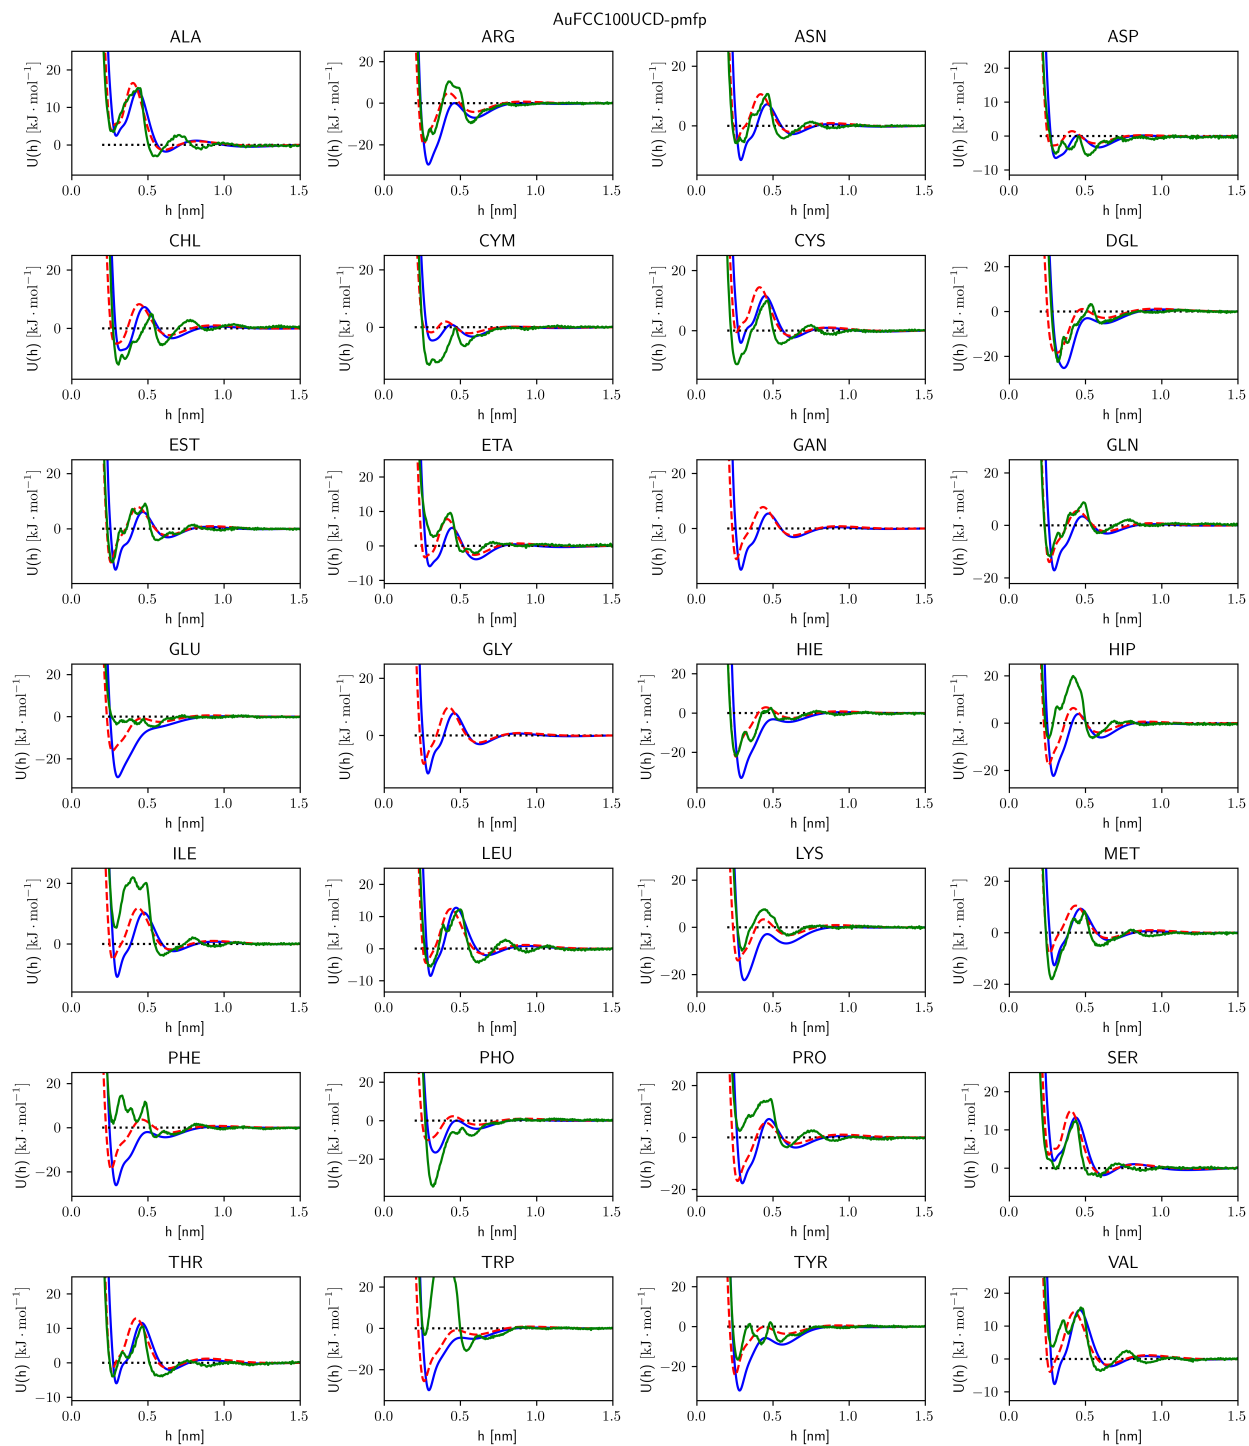

**Figure S3** Generated potentials of mean force for the Au FCC (100) surface, showing the canonical form (blue), match to original parameters (red, dashed) and input PMF where available (green).

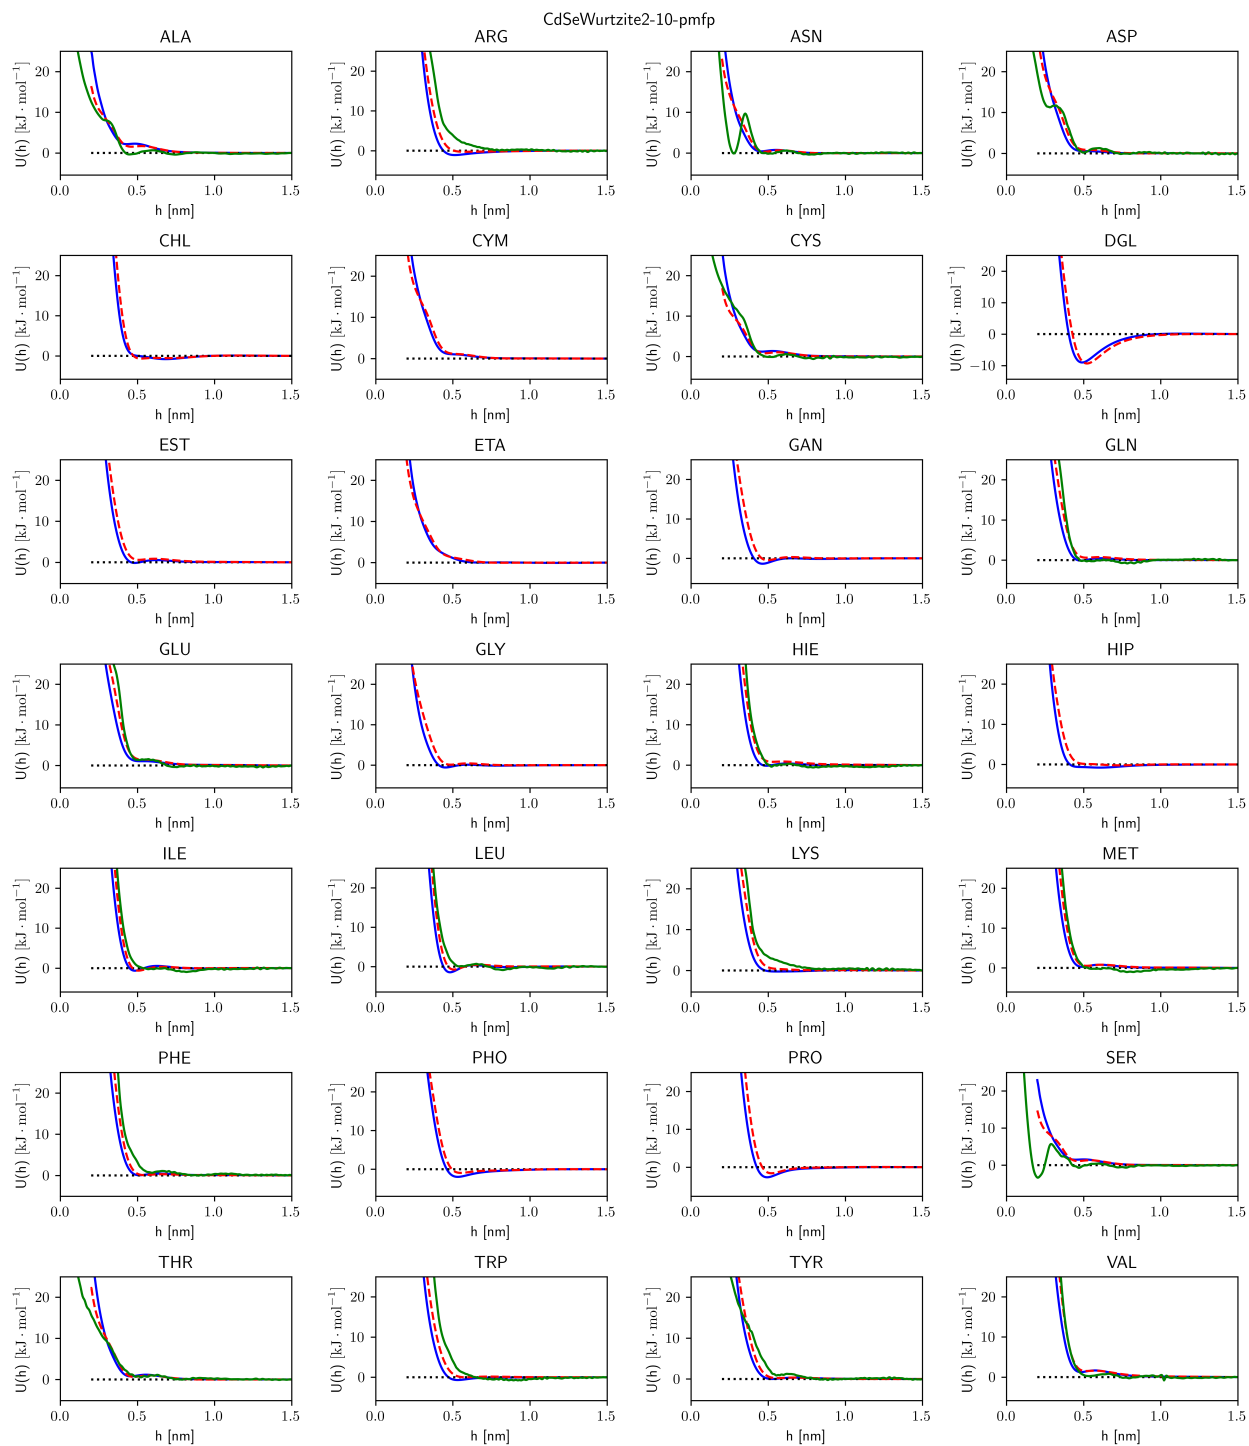

**Figure S4** Generated potentials of mean force for the CdSe wurtzite (2-10) surface, showing the canonical form (blue), match to original parameters (red, dashed) and input PMF where available (green).

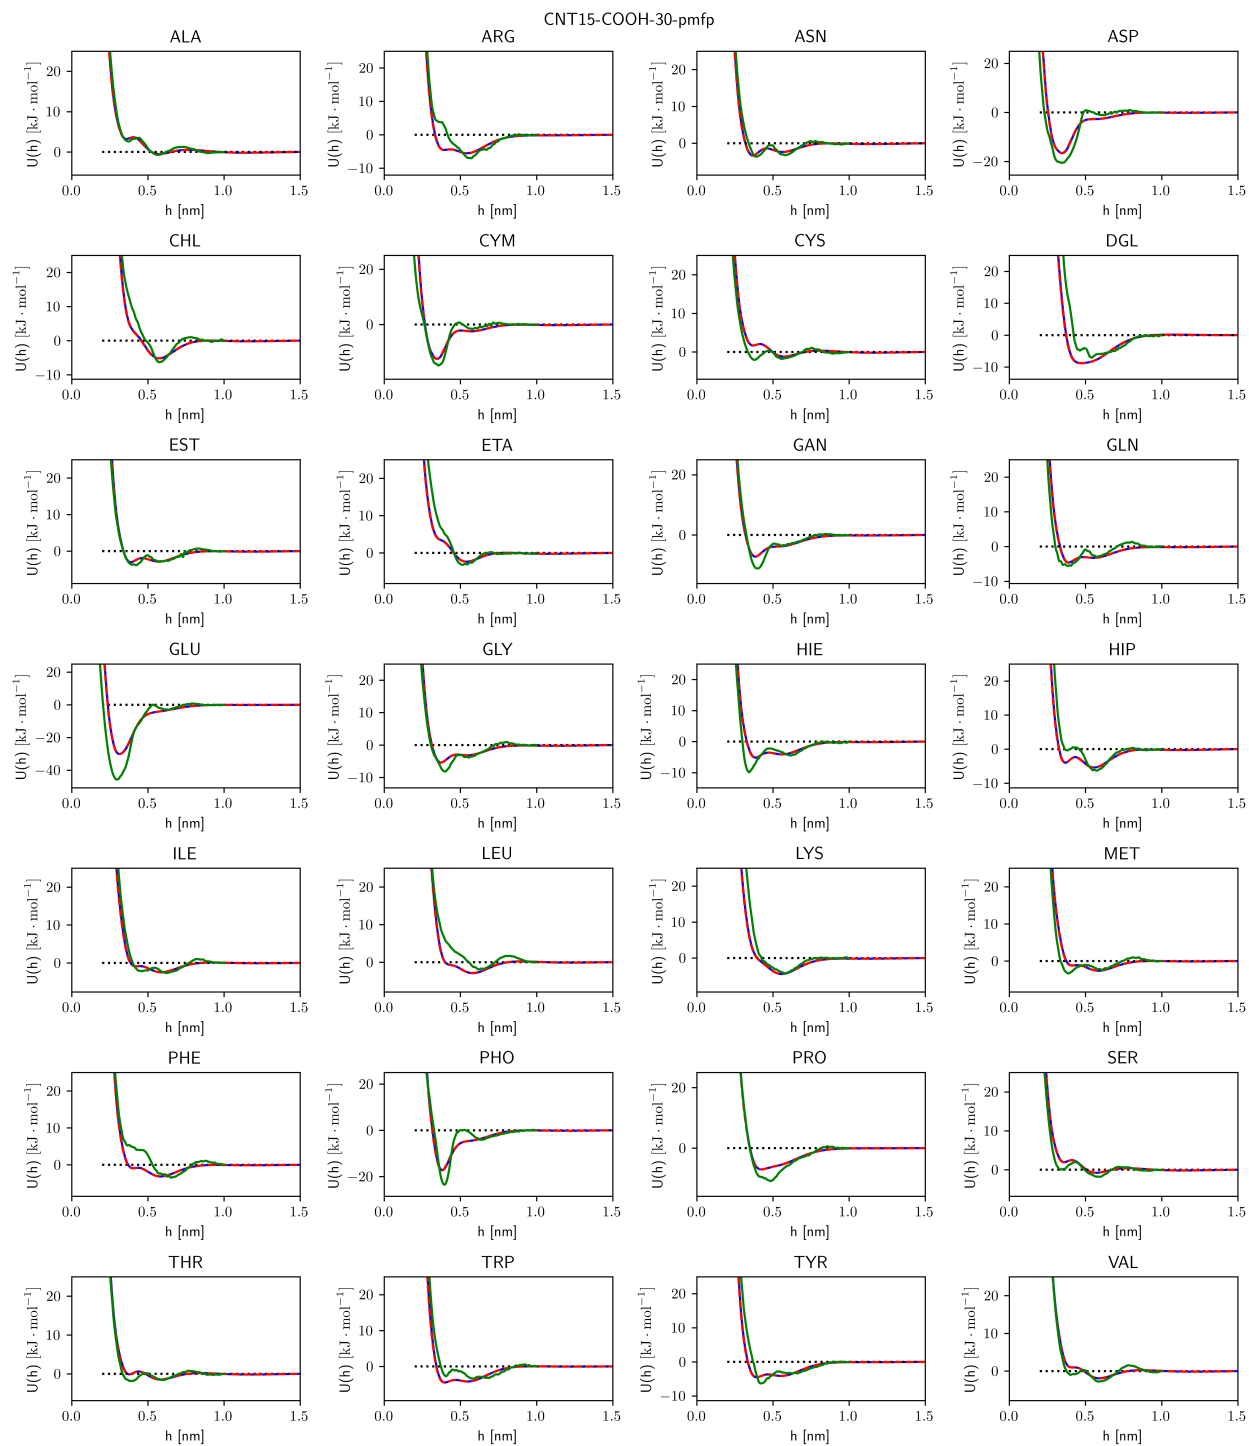

**Figure S5** Generated potentials of mean force for the 30% by weight COOH modified carbon nanotube surface, showing the canonical form (blue), match to original parameters (red, dashed) and input PMF where available (green).

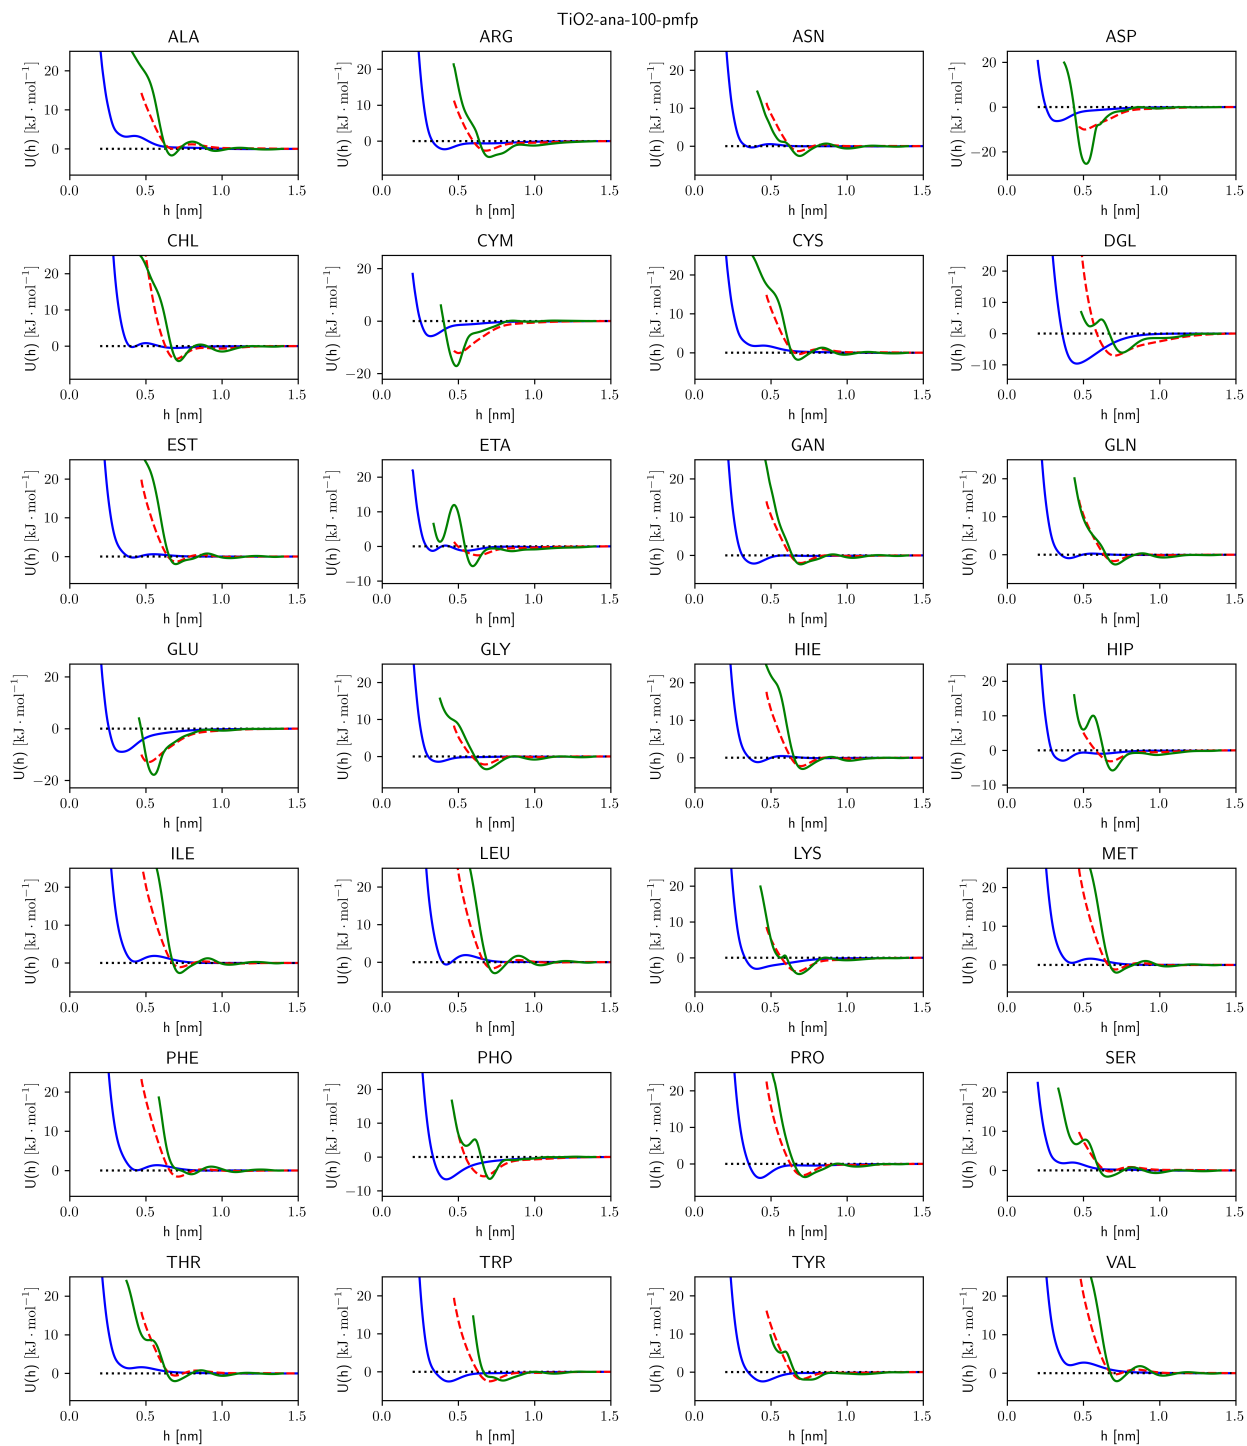

**Figure S6** Generated potentials of mean force for the titanium dioxide anatase (100) surface, showing the canonical form (blue), match to original parameters (red, dashed) and input PMF where available (green).
